# Supplementary material
Source: PubMed Central journal article supplement (PMC2575156)

## Supplementary Information

**Supplementary Information Figure S1.** Immunoblot of GATE-16 in MEFs. The MEFs of the indicated genotype were cultured in the presence or absence of lysosomal inhibitors (E64d and pepstatin A: E/P) for 24 h. The cell lysates were subjected to SDS-PAGE and analyzed by immunoblotting with anti-GATE-16, anti-Atg3, and anti-actin antibodies. Data shown are representative of three separate experiments. While treatment of the inhibitors in wild-type MEFs led to appearance of GATE-16-II (PE-conjugated form), we recognized only GATE-16-I (free form) under both conditions in *Atg3*<sup>-/-</sup> MEFs. These results indicate that GATE-16-I was converted to GATE-16-II in wild-type but not *Atg3*-deficient MEFs, and GATE-16-II was degraded in lysosomes.

**Supplementary Information Figure S2.** Long exposure of images of the immunoblot data shown in Fig. 3A. Note that the amount of free Atg5 in *Atg3*-deficient MEFs increased significantly. Data represent three independent experiments.

**Supplementary Information Figure S3.** Appearance of dots positive for GFPAtg5 and Atg16L in *Atg3*-deficient MEFs is dependent on phosphatidylinositol 3-kinases. (A) Each wild-type and *Atg3*-deficient MEFs were pre-treated with a phosphatidylinositol 3-kinases inhibitor, Wortmannin (100 nM) for 2 h, and then cultured under nutrient-rich (non-deprived) or nutrient-poor (deprived) conditions in the presence or absence of Wortmannin.

Subsequently, the cells were fixed and then immunostained with anti-Atg16L. Bars; 10  $\mu\text{m}$ . **(B)** The number of Atg16L-positive dots in MEF (n=20) was determined in each genotype. Data are mean $\pm$ SD. **\*\*** $P$ <0.01 by Student's *t*-test.

**Supplementary Information Figure S4.** Induction of autophagosome-like structures in *Atg3*-deficient MEFs was suppressed by treatment of phosphatidylinositol 3-kinases inhibitor, wortmannin. Each wild-type and *Atg3*-deficient MEFs were pre-treated with wortmannin (100 nM) for 2 h, and then cultured under nutrient-rich (non-deprived) or nutrient-poor (deprived) conditions in the presence or absence of wortmannin. They were fixed and processed for electron microscopy. The number of autophagosomes-like structures in each genotype was determined (n=20, for details, see Material and Methods). Data are mean $\pm$ SD. **\*** $P$ <0.01, by Student's *t*-test.

**Supplementary Information Figure S5.** Histology of major organs of *Atg3*<sup>-/-</sup> mice. Hematoxylin & eosin staining of sections from the major organs of *Atg3*<sup>+/-</sup> (left panels) and *Atg3*<sup>-/-</sup> (right panels) at 1 day after birth. Brain (**A** and **B**), thymus (**C** and **D**), heart (**E** and **F**), lung (**G** and **H**), liver (**I** and **J**), kidney (**K** and **L**), and intestine (**M** and **N**). Bars: 100  $\mu\text{m}$ .

**Supplementary Information Figure S6.** *In vitro* reconstitution assay for Atg12-Atg5 conjugate formation. 0.1  $\mu\text{M}$  of each protein (hAtg7, hAtg10, hAtg5 and hAtg12) and 5 mM ATP were reacted in the presence or absence of

hAtg3. The Atg12-Atg5 conjugates were detected by anti-Atg12 and anti-Atg5 antibodies. Note that Atg3 did not enhance the formation of Atg12-Atg5 conjugates *in vitro*. Representative data of similar results from three experiments.

**Supplementary Information Videos 1 and 2.** Time-lapse video microscopic analysis of the life span of GFPAtg5 dots in *Atg3<sup>+/+</sup>*;GFPAtg5 (video 1) and *Atg3<sup>-/-</sup>*;GFPAtg5 (video 2) MEFs. See Figure 4 for quantitative analysis. Bar: 2  $\mu\text{m}$ .

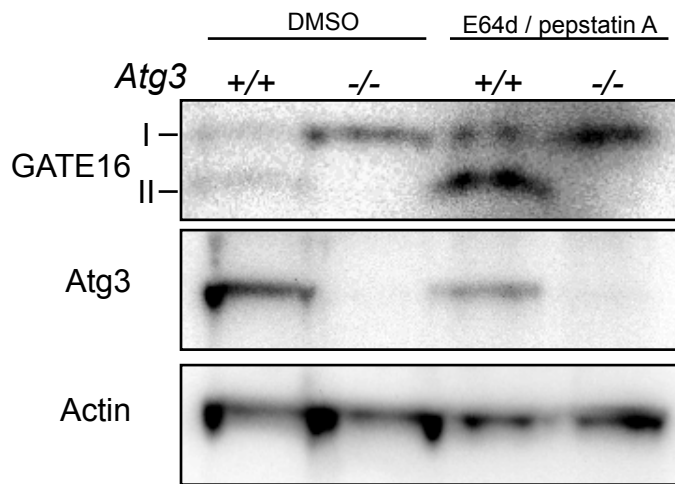

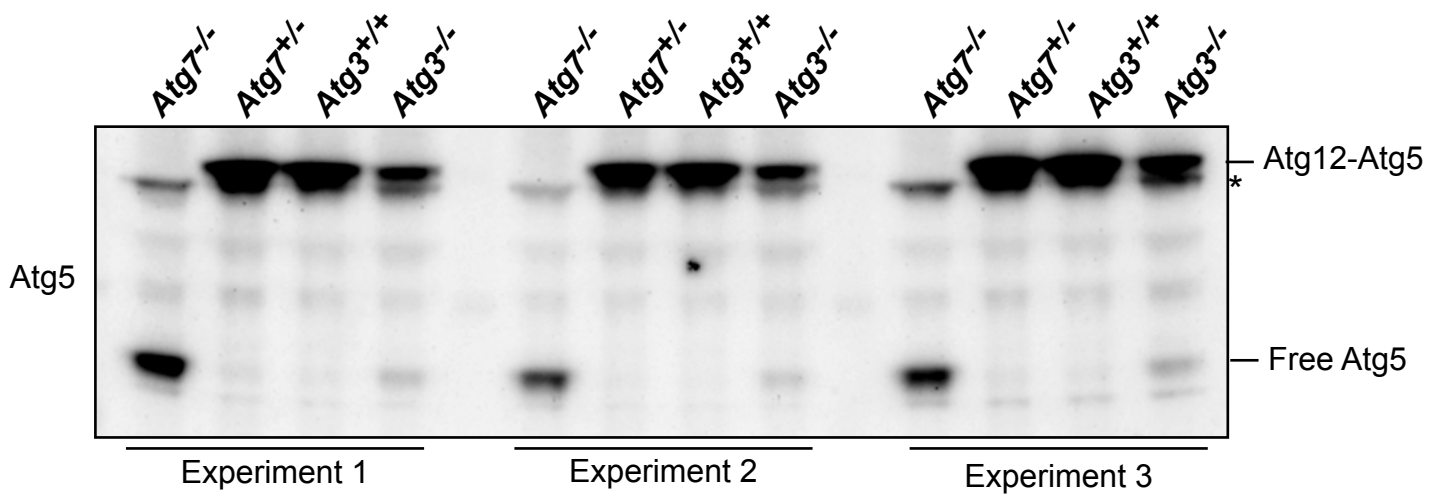

**A**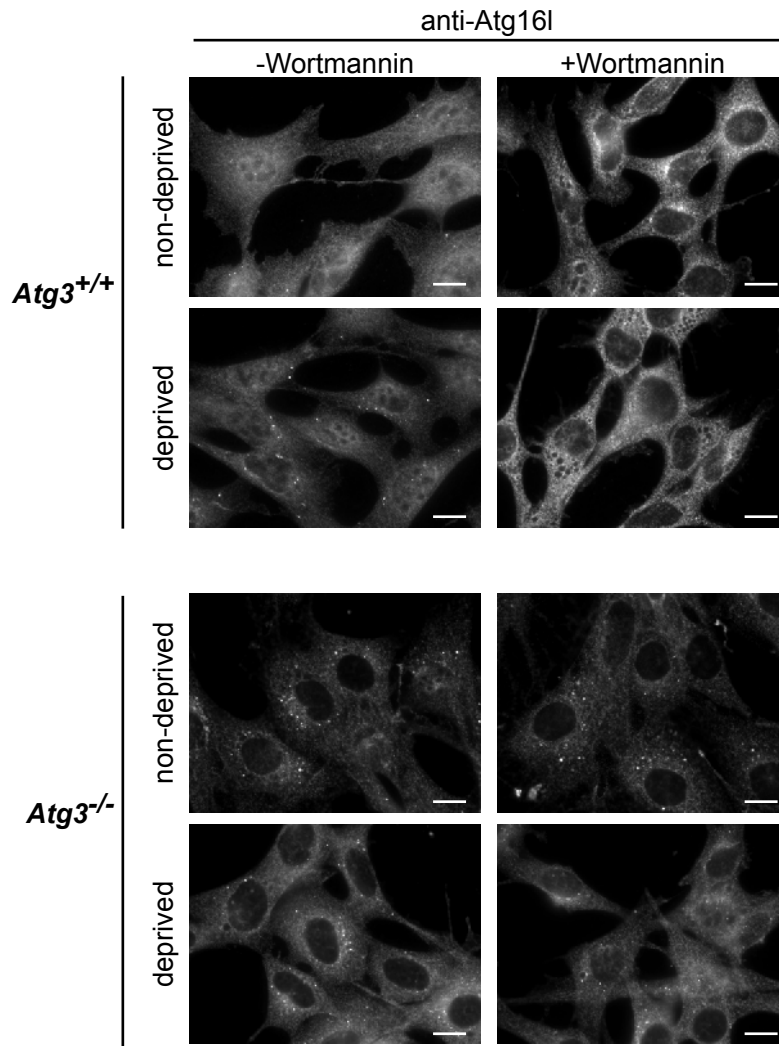**B**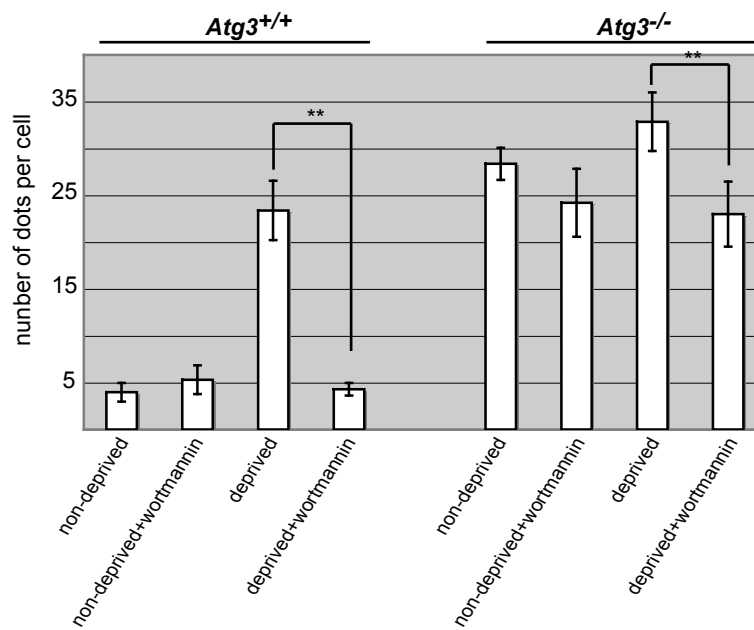

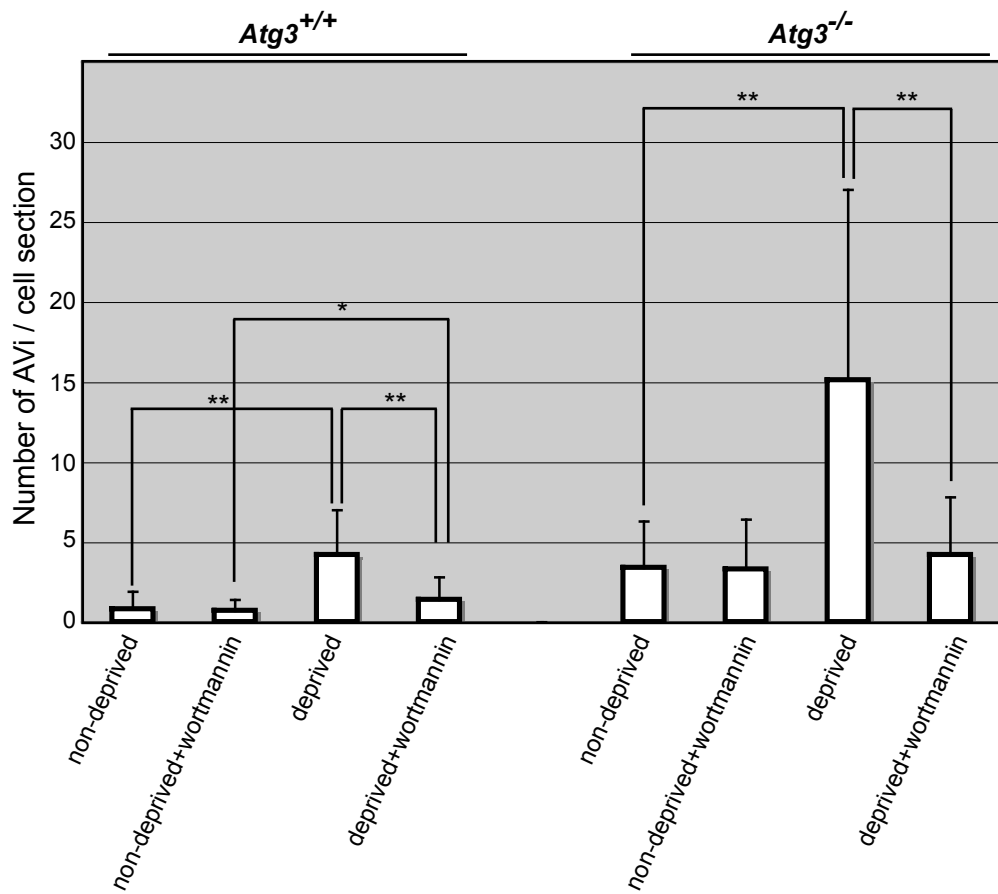

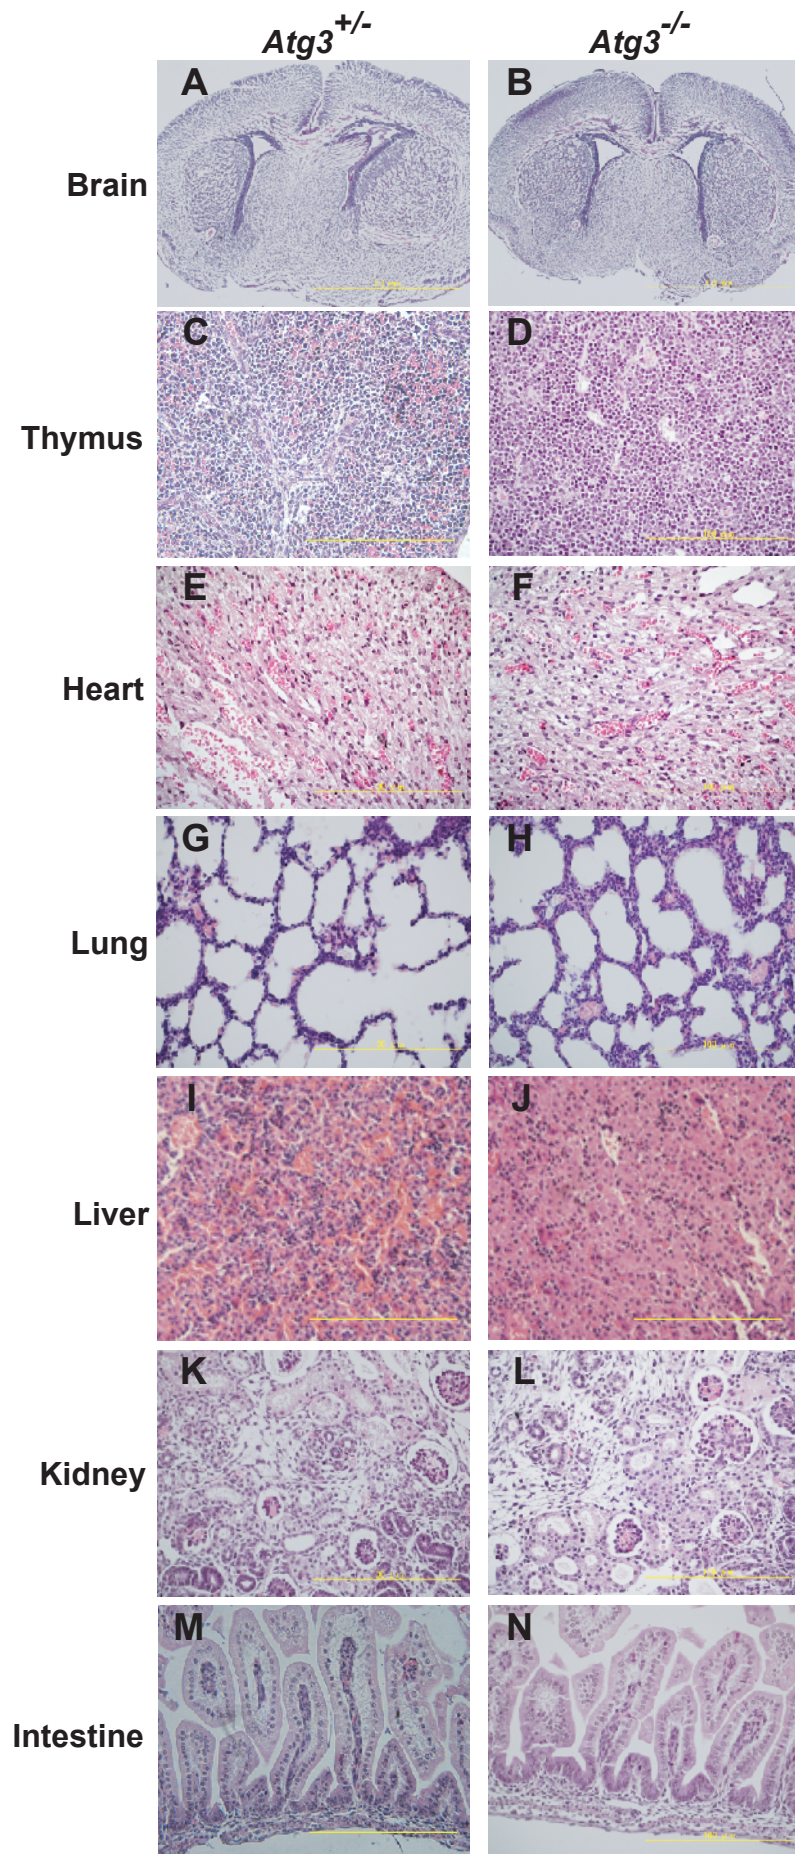



|        |   |   |   |   |   |   |
|--------|---|---|---|---|---|---|
| Atg12  | + | + | + | + | + | + |
| Atg7   | + | - | + | + | + | + |
| Atg10  | - | + | + | + | + | + |
| Atg5   | + | + | + | + | + | + |
| Atg3   | - | - | - | - | + | - |
| Atg3CA | - | - | - | - | - | + |
| ATP    | + | + | + | - | + | + |

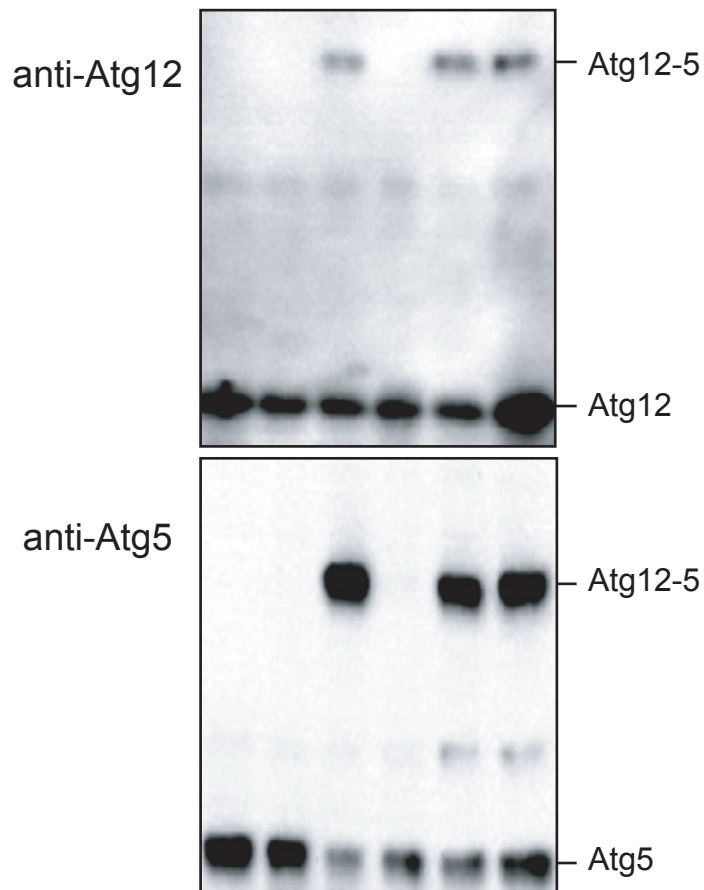

Supplement: E08-03-0309_1.pdf [file E08-03-0309_1.pdf]
